# Supplementary material for: HERV-W group evolutionary history in non-human primates: characterization of ERV-W orthologs in Catarrhini and related ERV groups in Platyrrhini
Source: PubMed Central journal article supplement (PMC5775608; doi:10.1186/s12862-018-1125-1), 2018-01-19

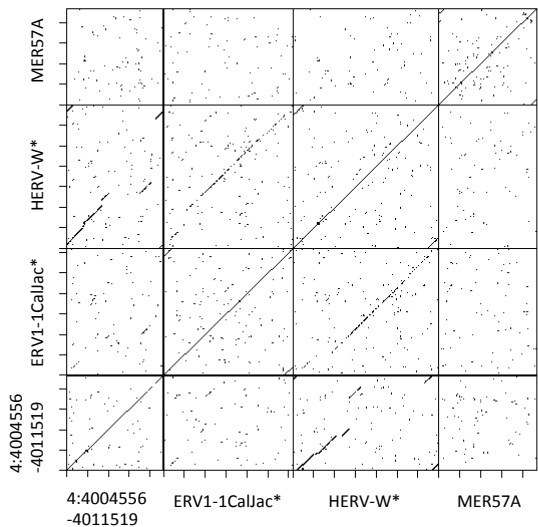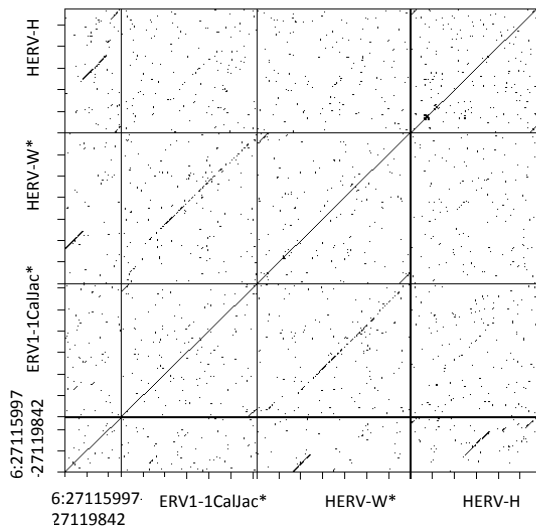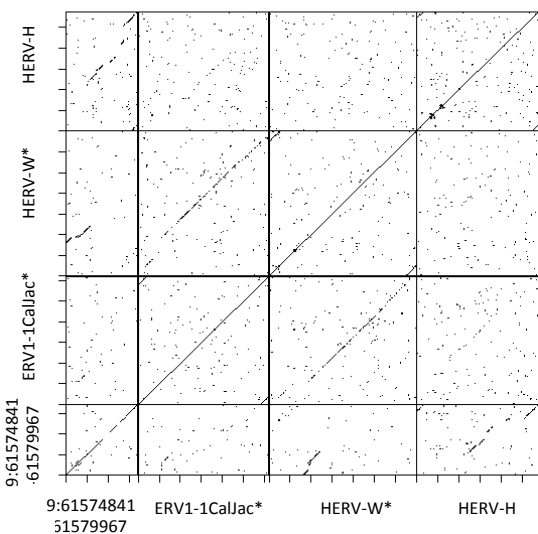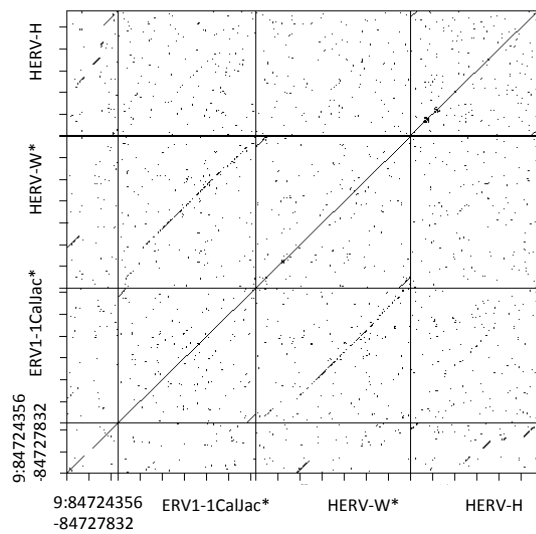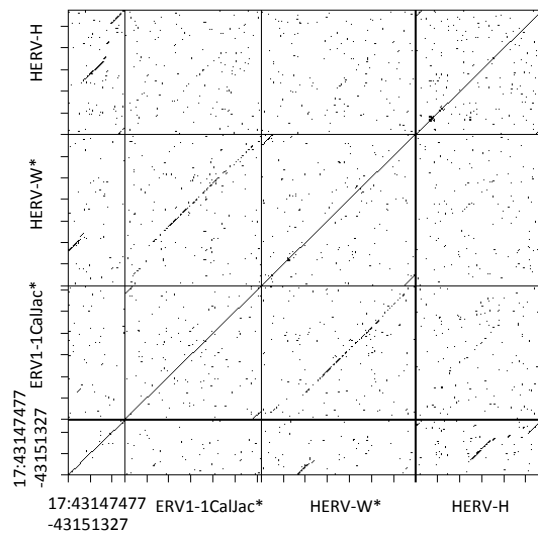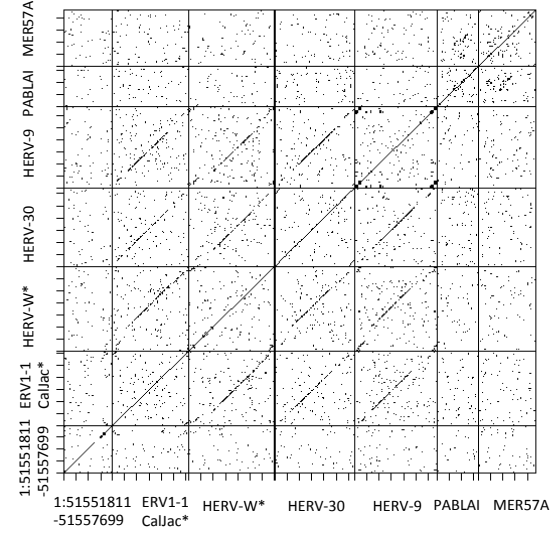

Supplement: 12862_2018_1125_MOESM6_ESM.pdf [file 12862_2018_1125_MOESM6_ESM.pdf]
